# Supplementary material for: Disentangling associations between vegetation greenness and dengue in a Latin American city: Findings and challenges
Source: PubMed Central journal article supplement (PMC8519391; doi:10.1016/j.landurbplan.2021.104255), 2021-12
Supplement: mmc1.pdf [file mmc1.pdf]

## Supporting Information

### Disentangling associations between vegetation greenness and dengue in a Latin American city: findings and challenges

Number of figures: 2

Number of tables: 1

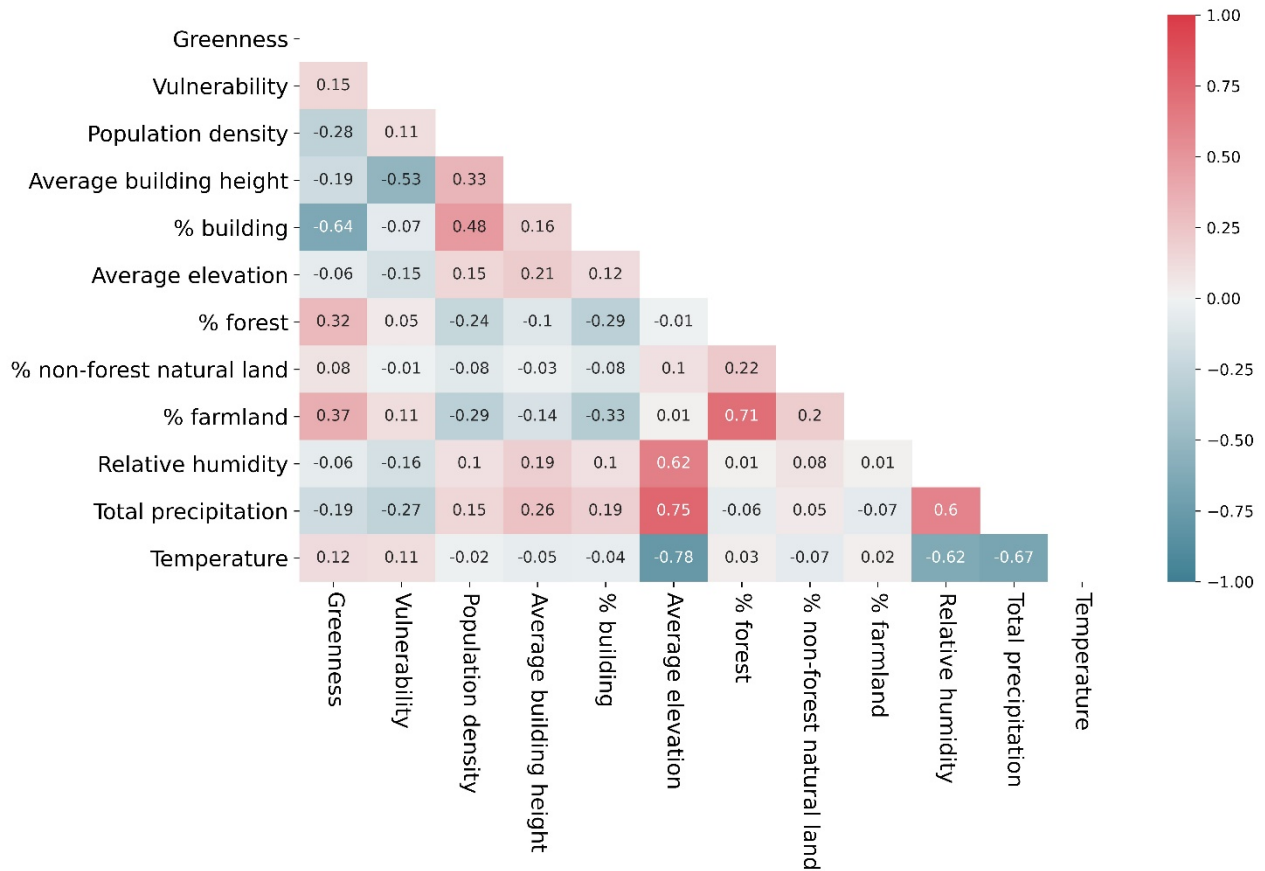

Figure S1 Spearman's rank correlation between the exposure and covariates.

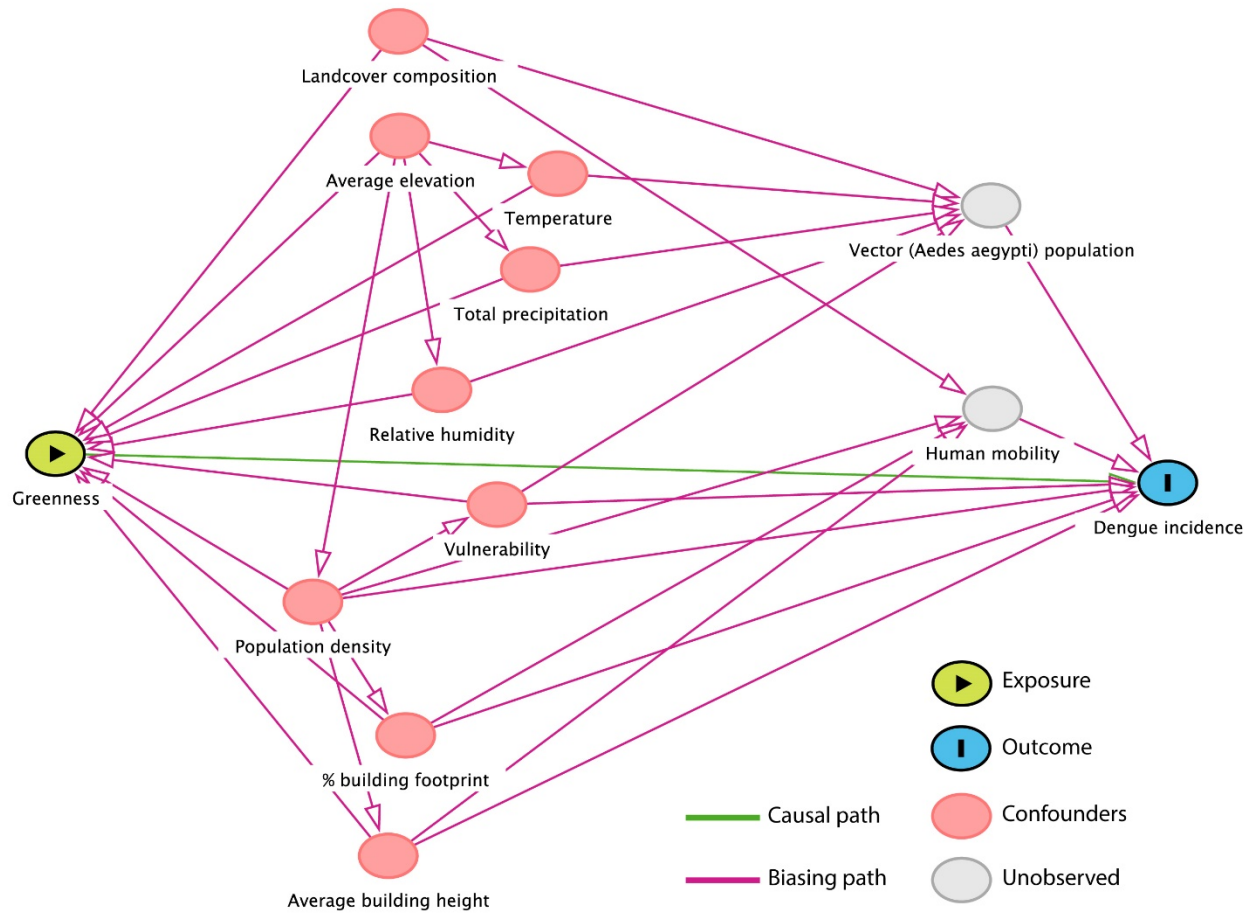

Figure S2 Directed acyclic graph for the outcome, exposure, and confounders

Table S1 Sensitivity test with alternative model specifications

Sensitivity test for model 2, Table 3

|                           | Main model                  | Alternative specifications  |                           |                             |
|---------------------------|-----------------------------|-----------------------------|---------------------------|-----------------------------|
|                           | (2)                         | (2-1)                       | (2-2)                     | (2-3)                       |
| <i>Fix effects</i>        |                             |                             |                           |                             |
| Greenness (-10-10)        | 0.949<br>[0.878,1.025]      | 0.812***<br>[0.718,0.919]   | 0.949<br>[0.890,1.011]    | 0.980<br>[0.904,1.061]      |
| Vulnerability (HVI, 0-10) | 1.254***<br>[1.162,1.354]   | 1.354***<br>[1.219,1.504]   | 1.254***<br>[1.193,1.319] | 1.247***<br>[1.139,1.364]   |
| Controls                  | Yes                         | Yes                         | Yes                       | Yes                         |
| Random intercept          | Yes                         | No                          | Yes                       | No                          |
| Random slope              | No                          | No                          | No                        | No                          |
| Fixed effects             | No                          | No                          | No                        | Yes                         |
| Confidence interval       | Neighborhood-cluster-robust | Neighborhood-cluster-robust | Independent               | Neighborhood-cluster-robust |
| Number of observations    | 3826                        | 3826                        | 3826                      | 3826                        |

Sensitivity test for model 3, Table 3

|                                    | Main model                  | Alternative specifications |
|------------------------------------|-----------------------------|----------------------------|
|                                    | (3)                         | (3-1)                      |
| <i>Fix effects</i>                 |                             |                            |
| Greenness (-10-10)                 | 0.915**<br>[0.843,0.994]    | 0.915**<br>[0.852,0.984]   |
| Vulnerability (HVI, 0-10)          | 1.269***<br>[1.176,1.368]   | 1.269***<br>[1.205,1.335]  |
| <i>Random effects</i> <sup>a</sup> |                             |                            |
| var(Greenness)                     | 0.050***<br>[0.022,0.115]   | 0.050***<br>[0.025,0.100]  |
| var(Intercept)                     | 0.689***<br>[0.420,1.129]   | 0.689***<br>[0.448,1.059]  |
| Controls                           | Yes                         | Yes                        |
| Random intercept                   | Yes                         | Yes                        |
| Random slope                       | Yes                         | Yes                        |
| Confidence interval                | Neighborhood-cluster-robust | Independent                |
| Number of observations             | 3826                        | 3826                       |

Sensitivity test for model 4, Table 3

|                                    | Main model                  | Alternative specifications |
|------------------------------------|-----------------------------|----------------------------|
|                                    | (4)                         | (4-1)                      |
| <i>Fix effects</i>                 |                             |                            |
| Greenness (-10-10)                 | 1.316***<br>[1.108,1.564]   | 1.316***<br>[1.169,1.483]  |
| Vulnerability (HVI, 0-10)          | 1.824***<br>[1.509,2.205]   | 1.824***<br>[1.609,2.069]  |
| Greenness × Vulnerability          | 0.879***<br>[0.825,0.938]   | 0.879***<br>[0.845,0.915]  |
| <i>Random effects</i> <sup>a</sup> |                             |                            |
| var(Intercept)                     | 0.532***<br>[0.440,0.644]   | 0.532***<br>[0.448,0.633]  |
| Controls                           | Yes                         | Yes                        |
| Random intercept                   | Yes                         | Yes                        |
| Random slope                       | No                          | No                         |
| Confidence interval                | Neighborhood-cluster-robust | Independent                |
| Number of observations             | 3826                        | 3826                       |

Note: A coefficient, or incidence rate ratio (IRR), is the factor by which the dengue incidence rate (dengue cases per 100,000 residents) changes for a one-unit increase in the corresponding covariate, when holding other covariates constant. Vulnerability is measured by the Health Vulnerability Index (HVI) that encompasses indicators of health-related infrastructures and resident socioeconomic status from the 2010 census. Models additionally controls for population density, average building height, the percentage of census tract area covered by building footprints (% building), land cover composition (% forest, % non-forester natural land, % farmland), relative humidity, total precipitation, and temperature. The coefficients of these covariates are omitted from the table for display purpose \*, \*\*, and \*\*\* indicate significant at p-value < 0.10, p-value < 0.05, and p-value < 0.01. 95% confidence intervals are in square brackets. Independent confidence intervals assume the census tracts are independent of each other. Neighborhood-cluster-robust confidence intervals accounts for the spatial autocorrelation between census tracts within the same neighborhood and heteroskedasticity.

<sup>a</sup>. Random effects are the variances of log transformed coefficients (IRRs).
